# Supplementary material for: Treatment for patients with autosomal dominant polycystic kidney disease in the chronic kidney disease without kidney replacement therapy in real-world clinical practice: a descriptive retrospective cohort study
Source: PubMed Central journal article supplement — Ann Clin Epidemiol. 2024 Jan 26;6(2):33–41. doi: 10.37737/ace.24006 (PMC11006552; doi:10.37737/ace.24006), 2024-01-26
Supplement: ace24006s1.pdf [file ace24006s1.pdf]

## Supplementary Material

**Figure S1.** The definition of tolvaptan dose reduction or discontinuation

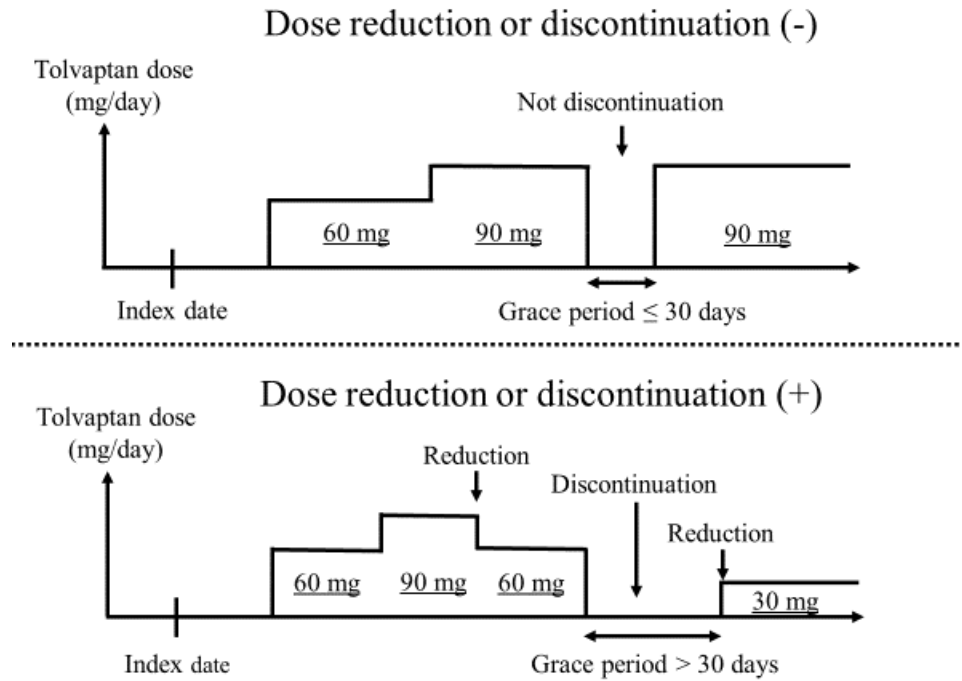

Figure S2. Methods of evaluating major adverse effects

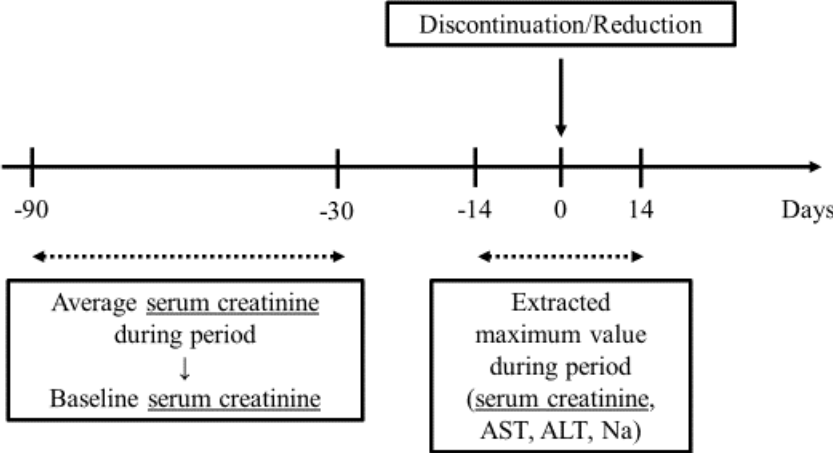

**Figure S3.** Sensitivity analysis: factors associated with tolvaptan dose reduction or discontinuation using eGFR

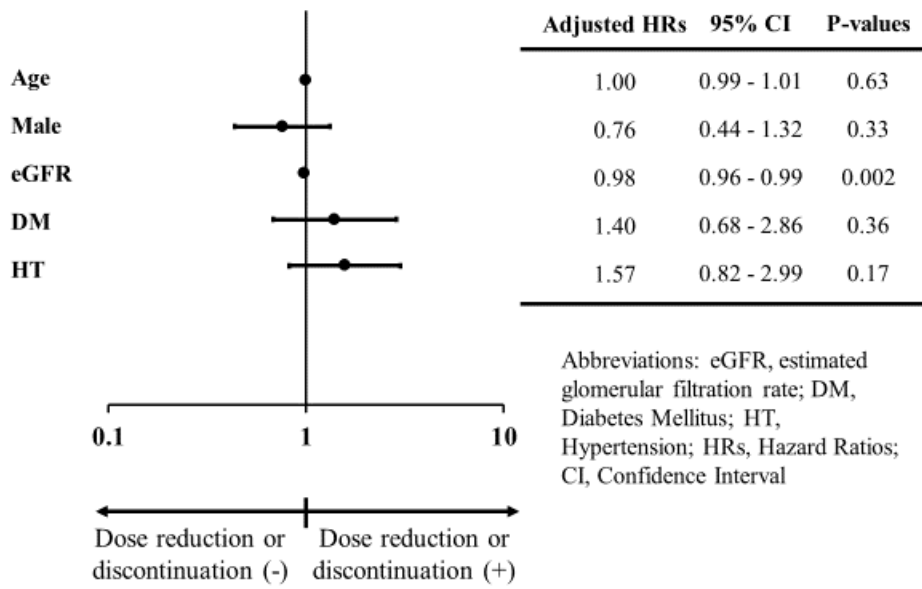

**Figure S4.** Secondary outcome: Factors associated with tolvaptan discontinuation

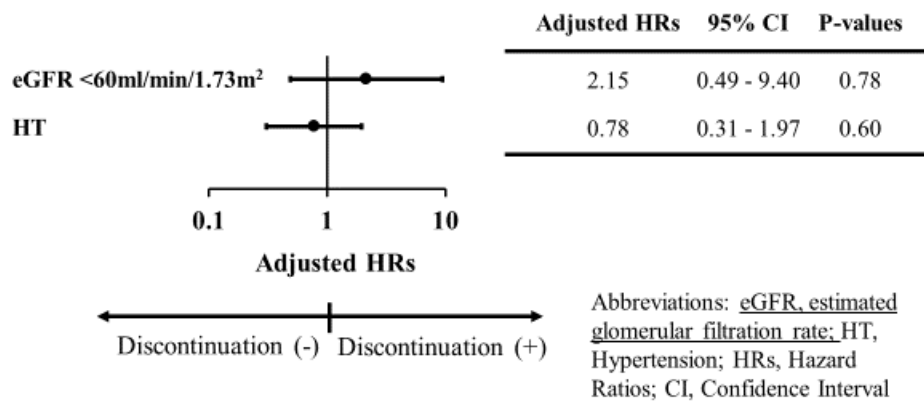

**Table S1.** Frequency of major adverse effects

| <b>Variables</b>                     | <b>Overall</b> |
|--------------------------------------|----------------|
| <b>Overall</b>                       | n=156          |
| Elevation in aminotransferase, n (%) | 6 (3.8)        |
| To > 3×ULN                           | 6 (3.8)        |
| To > 5×ULN                           | 5 (3.2)        |
| To > 10×ULN                          | 4 (2.6)        |
| Missing data                         | 20 (13)        |
| Hypernatremia, n (%)                 | 12 (7.7)       |
| To > 145 mEq/L                       | 12 (7.7)       |
| To > 150 mEq/L                       | 1 (0.64)       |
| To > 160 mEq/L                       | 0 (0)          |
| Missing data                         | 11 (7.1)       |
| Acute kidney injury, n (%)           | 6 (3.8)        |
| To > 1.5×Baseline serum creatinine   | 6 (3.8)        |
| To > 2.0×Baseline serum creatinine   | 5 (3.2)        |
| To > 3.0×Baseline serum creatinine   | 2 (1.3)        |
| Missing data                         | 20 (13)        |

Data were presented as unweighted number (percentage) of patients.

Abbreviations: ULN, Upper Limit of the Normal Range
